# Supplementary material
Source: publisher figshare collection journal article supplement (https://acs.figshare.com/ndownloader/files/10270242)
Supplement: Supplementary file 1 [file 10270242]

# Supporting Information

## **Discovery of 1,5-Diphenylpyrazole-3-Carboxamide Derivatives as Potent, Reversible, and Selective Monoacylglycerol Lipase (MAGL) Inhibitors**

Mojgan Aghazadeh Tabrizi, Pier Giovanni Baraldi, Stefania Baraldi, Emanuela Ruggiero, Lucia De Stefano, Flavio Rizzolio, Lorenzo Di Cesare Mannelli, Carla Ghelardini, Andrea Chicca, Margherita Lapillo, Jürg Gertsch, Clementina Manera, Marco Macchia, Adriano Martinelli, Carlotta Granchi, Filippo Minutolo and Tiziano Tuccinardi

### **Table of Contents**

|                                                                                          |        |
|------------------------------------------------------------------------------------------|--------|
| Figure S1. General binding hypothesis for the design of diphenylpyrazole MAGL inhibitors | S2     |
| Figure S2. LC-MS/MS quantification of endocannabinoids and other metabolites             | S2     |
| HPLC chromatograms of the final compounds                                                | S3-S26 |

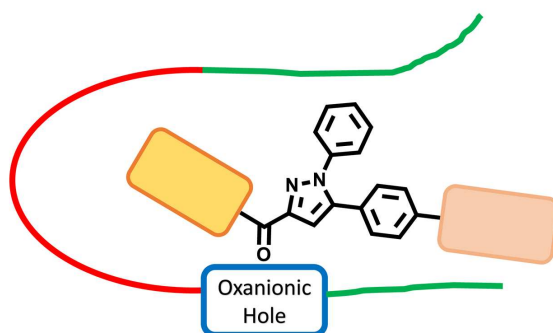

**Figure S1.** General binding hypothesis for the design of diphenylpyrazole MAGL inhibitors.

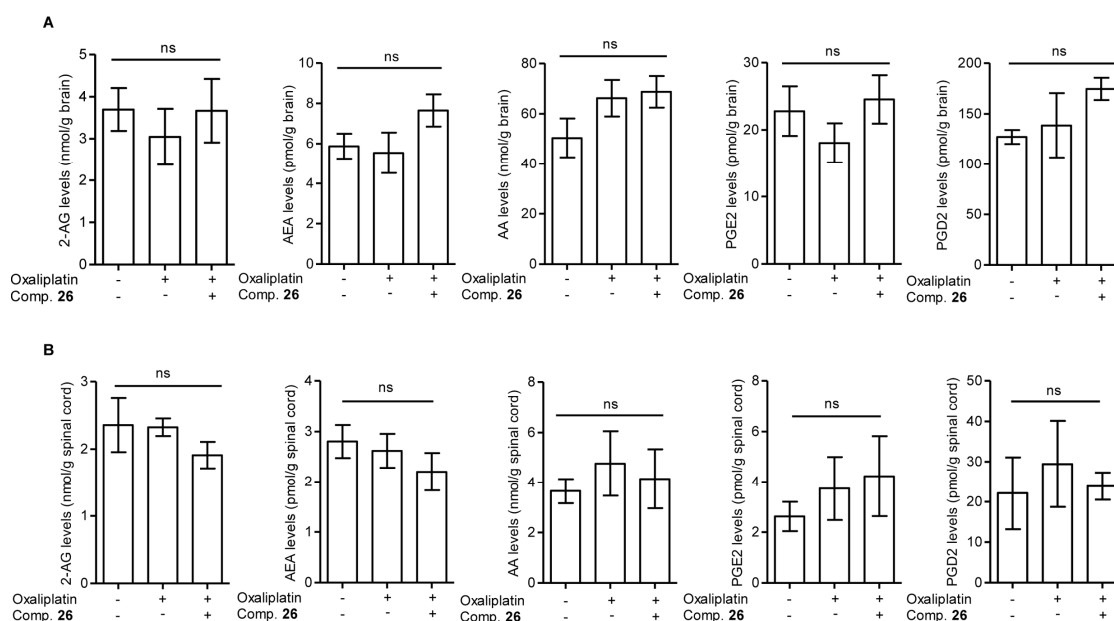

**Figure S2.** LC-MS/MS quantification of endocannabinoids and other metabolites. The amount of 2-AG, AEA, arachidonic acid (AA), prostaglandin-E2 (PGE2) and prostaglandin-D2 (PGD2) were measured in (A) brain and (B) spinal cord of mice treated for 14 days with oxaliplatin (2.4 mg/kg) and compound **26** (30 mg/kg, p.o.) or vehicle following the protocol described in the Methods. At day 15, animals were sacrificed by decapitation 1 h after the last dose and brain and spinal cord were collected. ns= not significant; n=5-7 mice per group.

## ==== Shimadzu LabSolutions Analysis Report =====

Sample Name : MAGL8\_125uM  
 Sample ID : MAGL8\_125uM  
 Data Filename : MAGL8\_125uM\_p.lcd  
 Method Filename : MAGL254.lcm

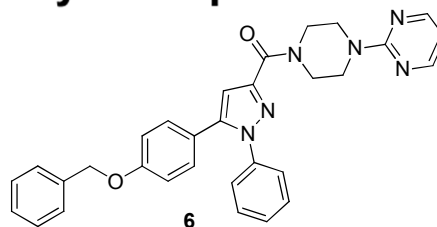

mAU

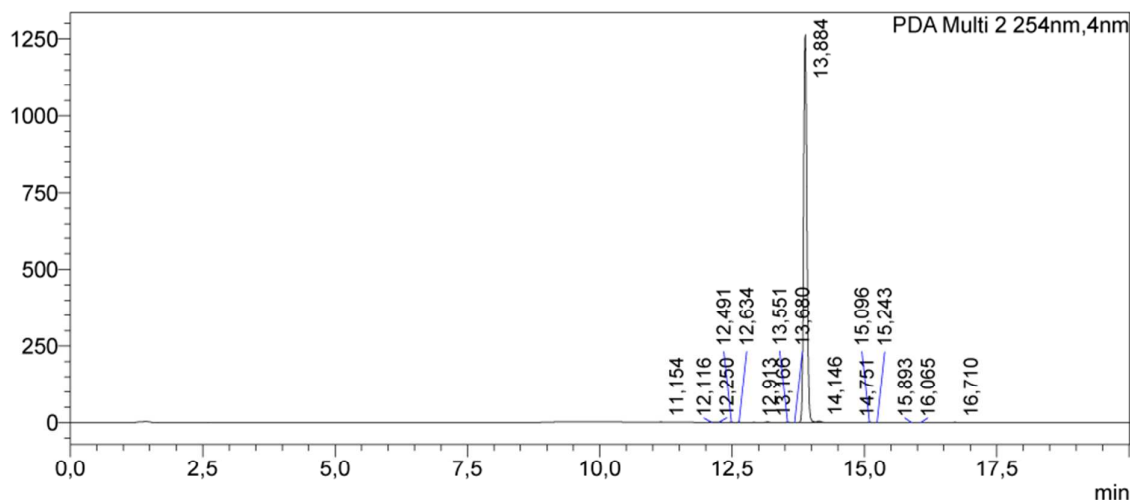

PDA Ch2 254nm

| Peak# | Ret. Time | Area    | Area%   | Height  |
|-------|-----------|---------|---------|---------|
| 1     | 11,154    | 11740   | 0,210   | 875     |
| 2     | 12,116    | 4734    | 0,085   | 871     |
| 3     | 12,250    | 2964    | 0,053   | 516     |
| 4     | 12,491    | 1334    | 0,024   | 237     |
| 5     | 12,634    | 1595    | 0,029   | 415     |
| 6     | 12,913    | 1752    | 0,031   | 396     |
| 7     | 13,166    | 8672    | 0,155   | 1958    |
| 8     | 13,551    | 4932    | 0,088   | 1253    |
| 9     | 13,680    | 1775    | 0,032   | 298     |
| 10    | 13,884    | 5503510 | 98,501  | 1263639 |
| 11    | 14,146    | 27956   | 0,500   | 4719    |
| 12    | 14,751    | 1886    | 0,034   | 353     |
| 13    | 15,096    | 4709    | 0,084   | 830     |
| 14    | 15,243    | 1318    | 0,024   | 184     |
| 15    | 15,893    | 2088    | 0,037   | 319     |
| 16    | 16,065    | 2186    | 0,039   | 342     |
| 17    | 16,710    | 4138    | 0,074   | 569     |
| Total |           | 5587289 | 100,000 | 1277774 |

Figure S1. HPLC chromatogram of compound 6.

## ==== Shimadzu LabSolutions Analysis Report =====

Sample Name : MAGL9\_125uM  
 Sample ID : MAGL9\_125uM  
 Data Filename : MAGL9\_125uM\_p.lcd  
 Method Filename : MAGL254.lcm

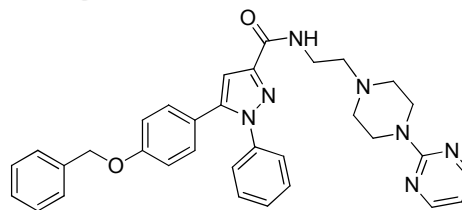

mAU

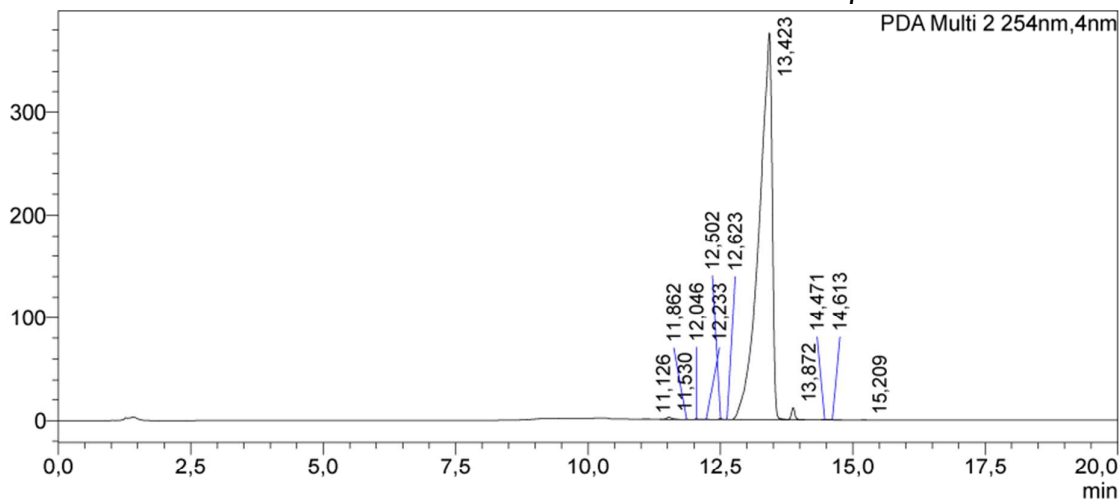

PDA Ch2 254nm

| Peak# | Ret. Time | Area    | Area%   | Height |
|-------|-----------|---------|---------|--------|
| 1     | 11,126    | 4472    | 0,068   | 278    |
| 2     | 11,530    | 18931   | 0,287   | 2204   |
| 3     | 11,862    | 1056    | 0,016   | 259    |
| 4     | 12,046    | 3773    | 0,057   | 778    |
| 5     | 12,233    | 4153    | 0,063   | 516    |
| 6     | 12,502    | 5306    | 0,080   | 1102   |
| 7     | 12,623    | 1489    | 0,023   | 363    |
| 8     | 13,423    | 6504383 | 98,440  | 376176 |
| 9     | 13,872    | 56781   | 0,859   | 11601  |
| 10    | 14,471    | 3789    | 0,057   | 386    |
| 11    | 14,613    | 2257    | 0,034   | 296    |
| 12    | 15,209    | 1090    | 0,017   | 166    |
| Total |           | 6607480 | 100,000 | 394125 |

Figure S2. HPLC chromatogram of compound 7.



## ==== Shimadzu LabSolutions Analysis Report =====

Sample Name : MAGL11\_125uM  
 Sample ID : MAGL11\_125uM  
 Data Filename : MAGL11\_125uM\_p.lcd  
 Method Filename : MAGL254.lcm

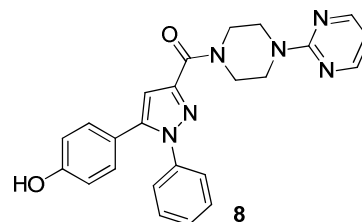

mAU

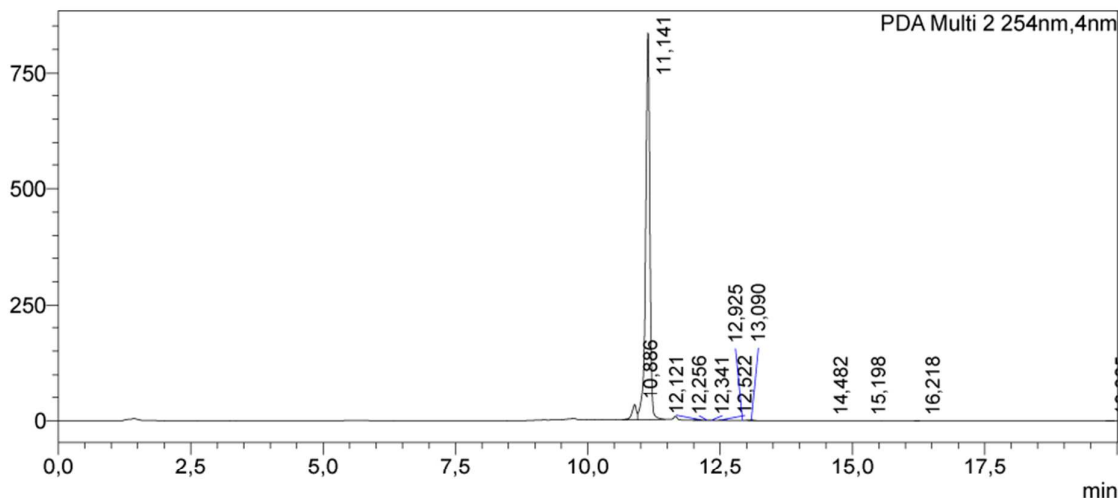

PDA Ch2 254nm

| Peak# | Ret. Time | Area    | Area%   | Height |
|-------|-----------|---------|---------|--------|
| 1     | 10,886    | 195409  | 4,053   | 32616  |
| 2     | 11,141    | 4585965 | 95,118  | 832702 |
| 3     | 12,121    | 11458   | 0,238   | 1325   |
| 4     | 12,256    | 1390    | 0,029   | 291    |
| 5     | 12,341    | 1362    | 0,028   | 263    |
| 6     | 12,522    | 8113    | 0,168   | 1088   |
| 7     | 12,925    | 1538    | 0,032   | 422    |
| 8     | 13,090    | 10532   | 0,218   | 1695   |
| 9     | 14,482    | 1019    | 0,021   | 140    |
| 10    | 15,198    | 1859    | 0,039   | 234    |
| 11    | 16,218    | 1117    | 0,023   | 186    |
| 12    | 19,865    | 1574    | 0,033   | 174    |
| Total |           | 4821336 | 100,000 | 871138 |

**Figure S3. HPLC chromatogram of compound 8.**

## ==== Shimadzu LabSolutions Analysis Report =====

Sample Name : MAGL15\_125uM\_2  
 Sample ID : MAGL15\_125uM\_2  
 Data Filename : MAGL15\_125uM\_2\_p.lcd  
 Method Filename : H2S donors 20min.lcm

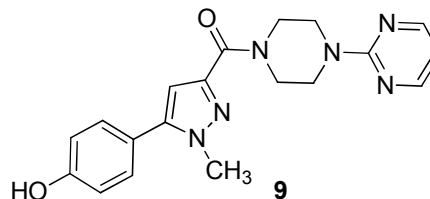

mAU

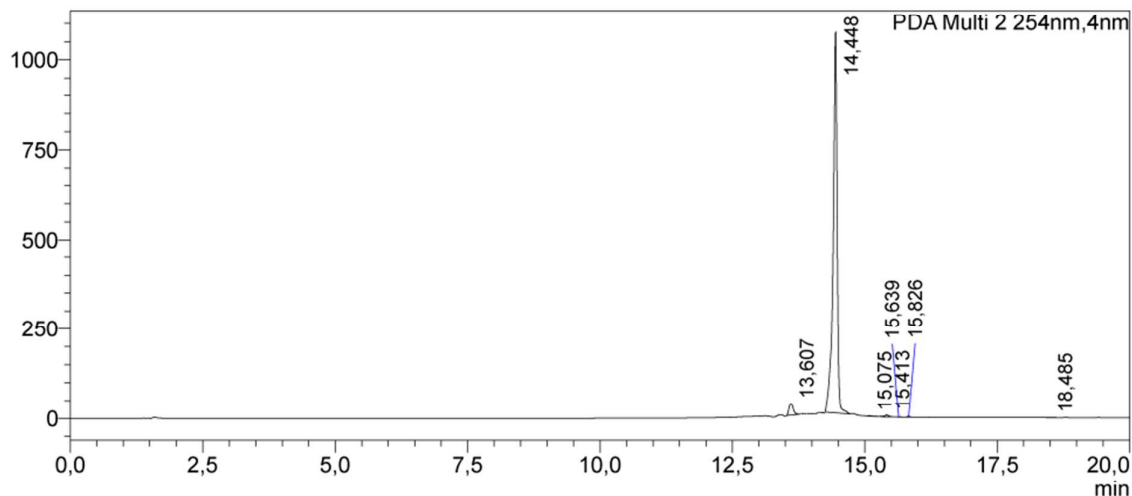

PDA Ch2 254nm

| Peak# | Ret. Time | Area    | Area%   | Height  |
|-------|-----------|---------|---------|---------|
| 1     | 13,607    | 191892  | 3,346   | 33590   |
| 2     | 14,448    | 5499559 | 95,908  | 1062172 |
| 3     | 15,075    | 5216    | 0,091   | 1328    |
| 4     | 15,413    | 26886   | 0,469   | 4932    |
| 5     | 15,639    | 1475    | 0,026   | 454     |
| 6     | 15,826    | 7801    | 0,136   | 2135    |
| 7     | 18,485    | 1382    | 0,024   | 251     |
| Total |           | 5734211 | 100,000 | 1104861 |

Figure S4. HPLC chromatogram of compound 9.

# ==== Shimadzu LabSolutions Analysis Report =====

Sample Name : MAGL12\_125uM  
 Sample ID : MAGL12\_125uM  
 Data Filename : MAGL12\_125uM\_p.lcd  
 Method Filename : MAGL254.lcm

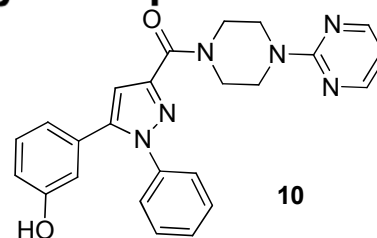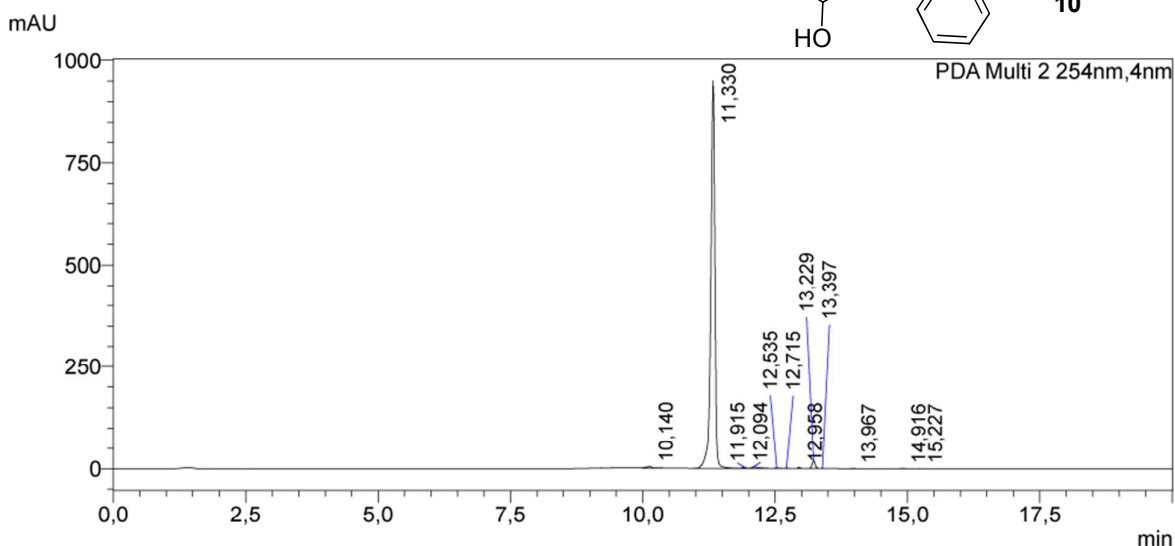

PDA Ch2 254nm

| Peak# | Ret. Time | Area    | Area%   | Height |
|-------|-----------|---------|---------|--------|
| 1     | 10,140    | 37872   | 0,729   | 3738   |
| 2     | 11,330    | 5001600 | 96,254  | 949195 |
| 3     | 11,915    | 10996   | 0,212   | 2745   |
| 4     | 12,094    | 30102   | 0,579   | 3518   |
| 5     | 12,535    | 7415    | 0,143   | 1316   |
| 6     | 12,715    | 4292    | 0,083   | 763    |
| 7     | 12,958    | 11792   | 0,227   | 2903   |
| 8     | 13,229    | 83647   | 1,610   | 19948  |
| 9     | 13,397    | 4125    | 0,079   | 964    |
| 10    | 13,967    | 1057    | 0,020   | 128    |
| 11    | 14,916    | 2366    | 0,046   | 391    |
| 12    | 15,227    | 1008    | 0,019   | 165    |
| Total |           | 5196272 | 100,000 | 985774 |

Figure S5. HPLC chromatogram of compound 10.

# ==== Shimadzu LabSolutions Analysis Report =====

Sample Name : MAGL13\_125uM  
 Sample ID : MAGL13\_125uM  
 Data Filename : MAGL13\_125uM\_p.lcd  
 Method Filename : MAGL254.lcm

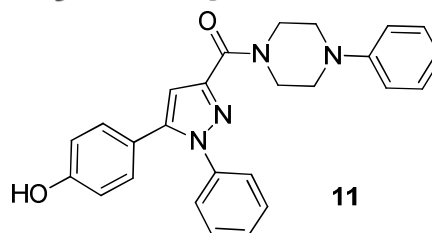

mAU

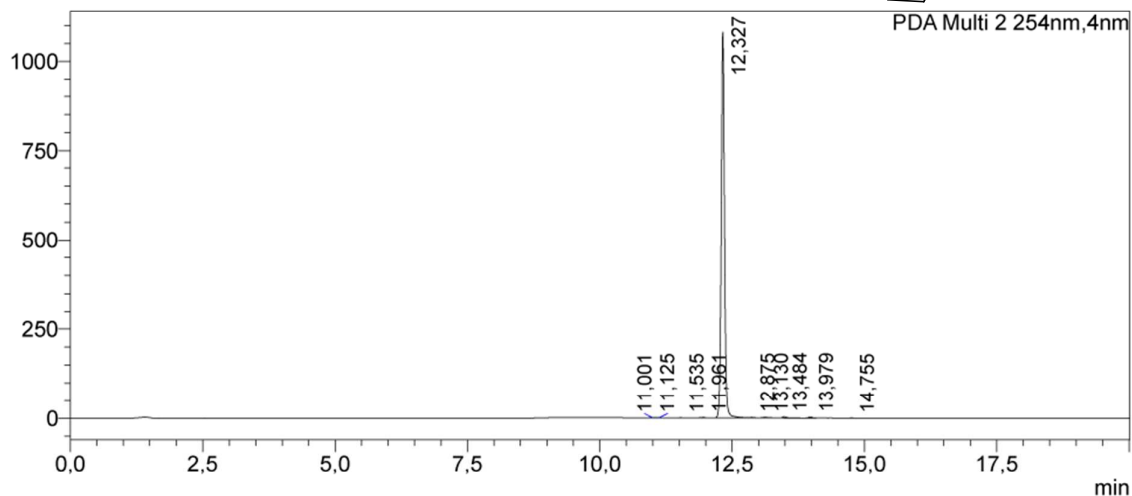

PDA Ch2 254nm

| Peak# | Ret. Time | Area    | Area%   | Height  |
|-------|-----------|---------|---------|---------|
| 1     | 11,001    | 2262    | 0,047   | 285     |
| 2     | 11,125    | 1102    | 0,023   | 198     |
| 3     | 11,535    | 2124    | 0,044   | 479     |
| 4     | 11,961    | 10380   | 0,215   | 1534    |
| 5     | 12,327    | 4756501 | 98,600  | 1081489 |
| 6     | 12,875    | 2950    | 0,061   | 825     |
| 7     | 13,130    | 14415   | 0,299   | 1873    |
| 8     | 13,484    | 18488   | 0,383   | 3723    |
| 9     | 13,979    | 14259   | 0,296   | 2972    |
| 10    | 14,755    | 1563    | 0,032   | 276     |
| Total |           | 4824044 | 100,000 | 1093654 |

Figure S6. HPLC chromatogram of compound 11.

# ==== Shimadzu LabSolutions Analysis Report =====

Sample Name : MAGL19 125uM  
 Sample ID : MAGL19 125uM  
 Data Filename : MAGL19\_125uM\_f.lcd  
 Method Filename : MAGL254.lcm

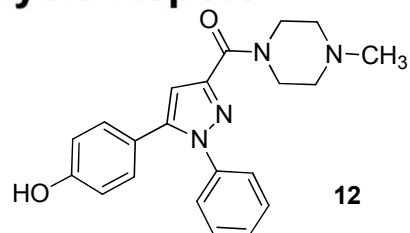

mAU

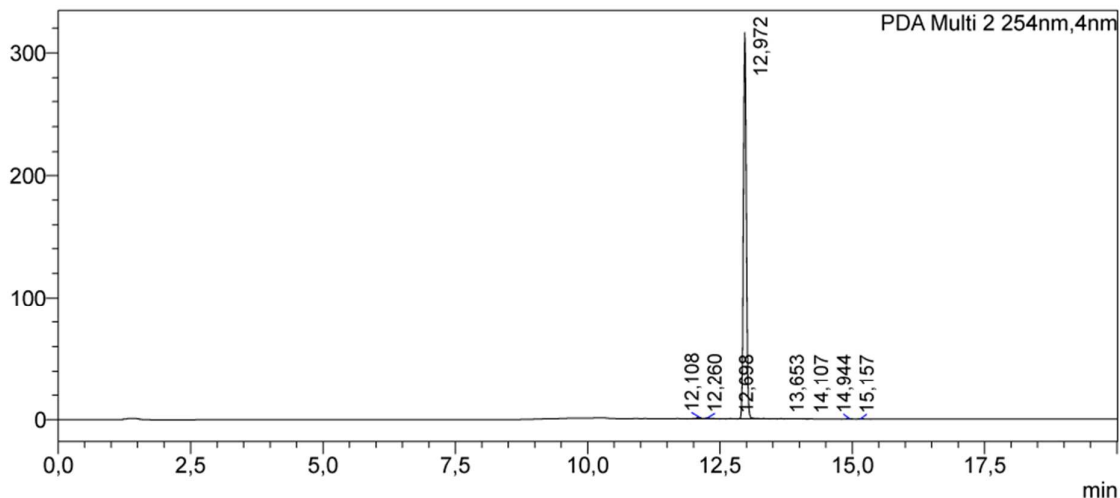

PDA Ch2 254nm

| Peak# | Ret. Time | Area    | Area%   | Height |
|-------|-----------|---------|---------|--------|
| 1     | 12,108    | 7233    | 0,594   | 1352   |
| 2     | 12,260    | 4504    | 0,370   | 638    |
| 3     | 12,698    | 1280    | 0,105   | 185    |
| 4     | 12,972    | 1200591 | 98,517  | 315906 |
| 5     | 13,653    | 1165    | 0,096   | 232    |
| 6     | 14,107    | 1191    | 0,098   | 235    |
| 7     | 14,944    | 1685    | 0,138   | 303    |
| 8     | 15,157    | 1015    | 0,083   | 156    |
| Total |           | 1218664 | 100,000 | 319007 |

Figure S7. HPLC chromatogram of compound 12.

# ==== Shimadzu LabSolutions Analysis Report =====

Sample Name : MAGL20\_250uM  
 Sample ID : MAGL20\_250uM  
 Data Filename : MAGL20\_250uM\_p.lcd  
 Method Filename : MAGL254.lcm

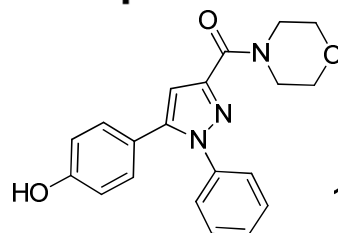

13

mAU

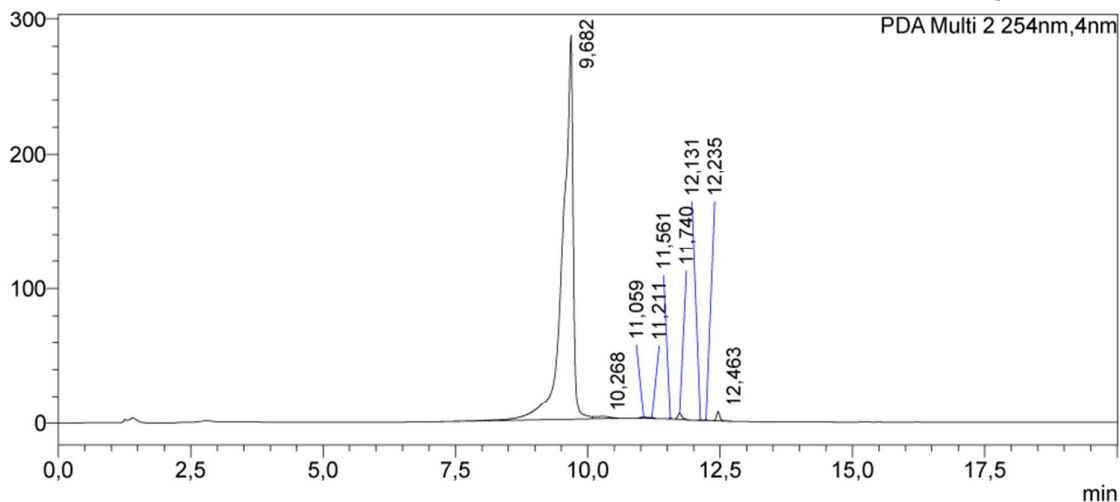

PDA Ch2 254nm

| Peak# | Ret. Time | Area    | Area%   | Height |
|-------|-----------|---------|---------|--------|
| 1     | 9,682     | 3897286 | 97,284  | 285267 |
| 2     | 10,268    | 31061   | 0,775   | 1544   |
| 3     | 11,059    | 10495   | 0,262   | 1180   |
| 4     | 11,211    | 4277    | 0,107   | 783    |
| 5     | 11,561    | 2706    | 0,068   | 838    |
| 6     | 11,740    | 25297   | 0,631   | 4638   |
| 7     | 12,131    | 1544    | 0,039   | 340    |
| 8     | 12,235    | 2188    | 0,055   | 413    |
| 9     | 12,463    | 31240   | 0,780   | 7040   |
| Total |           | 4006096 | 100,000 | 302042 |

Figure S8. HPLC chromatogram of compound 13.

# ==== Shimadzu LabSolutions Analysis Report =====

Sample Name : MAGL22\_125uM  
 Sample ID : MAGL22\_125uM  
 Data Filename : MAGL22\_125uM\_p.lcd  
 Method Filename : MAGL254.lcm

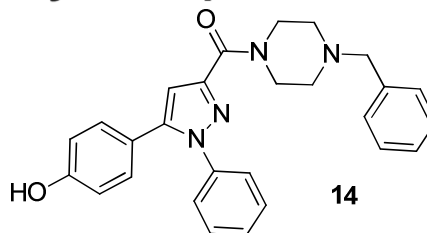

mAU

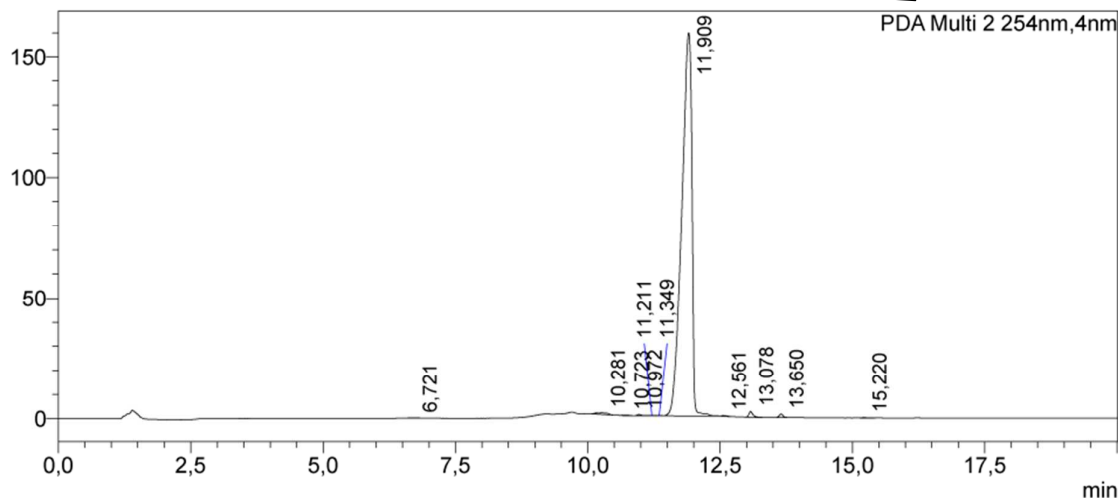

PDA Ch2 254nm

| Peak# | Ret. Time | Area    | Area%   | Height |
|-------|-----------|---------|---------|--------|
| 1     | 6,721     | 2822    | 0,131   | 210    |
| 2     | 10,281    | 9599    | 0,446   | 617    |
| 3     | 10,723    | 1193    | 0,055   | 166    |
| 4     | 10,972    | 3183    | 0,148   | 537    |
| 5     | 11,211    | 1285    | 0,060   | 149    |
| 6     | 11,349    | 1213    | 0,056   | 186    |
| 7     | 11,909    | 2107819 | 97,984  | 158820 |
| 8     | 12,561    | 1737    | 0,081   | 249    |
| 9     | 13,078    | 13194   | 0,613   | 2448   |
| 10    | 13,650    | 7877    | 0,366   | 1452   |
| 11    | 15,220    | 1268    | 0,059   | 176    |
| Total |           | 2151190 | 100,000 | 165009 |

Figure S9. HPLC chromatogram of compound 14.

# ==== Shimadzu LabSolutions Analysis Report =====

Sample Name : MAGL17\_250uM  
 Sample ID : MAGL17\_250uM  
 Data Filename : MAGL17\_250uM\_p.lcd  
 Method Filename : MAGL254.lcm

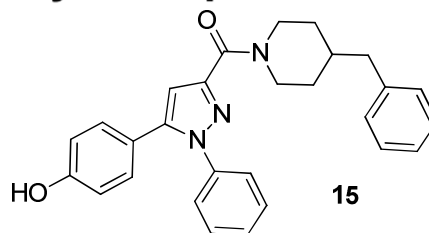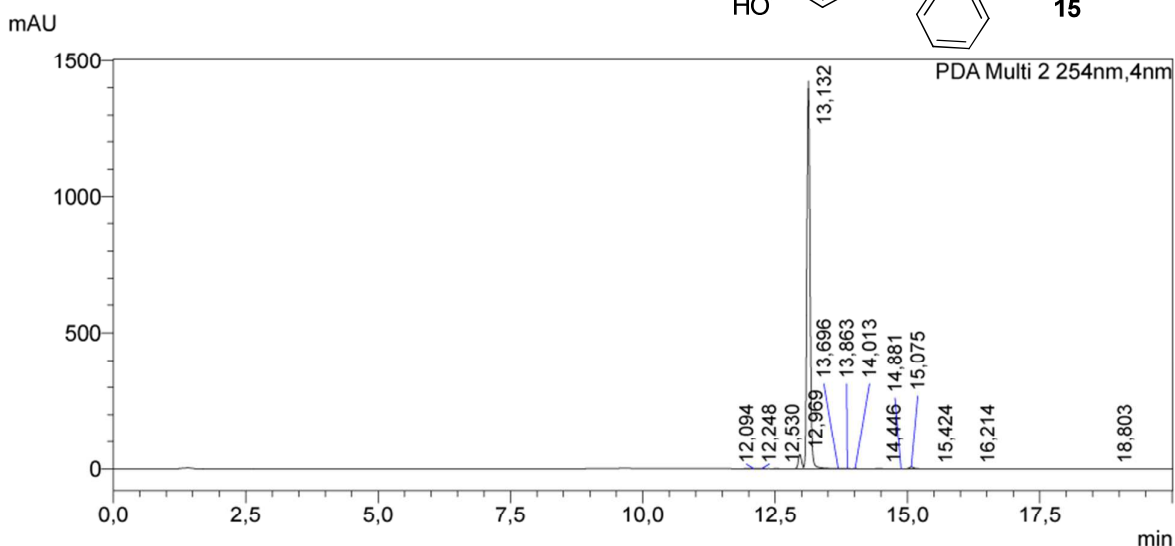

PDA Ch2 254nm

| Peak# | Ret. Time | Area    | Area%   | Height  |
|-------|-----------|---------|---------|---------|
| 1     | 12,094    | 8637    | 0,141   | 700     |
| 2     | 12,248    | 3221    | 0,053   | 537     |
| 3     | 12,530    | 3370    | 0,055   | 685     |
| 4     | 12,969    | 224485  | 3,663   | 51953   |
| 5     | 13,132    | 5818806 | 94,951  | 1424030 |
| 6     | 13,696    | 1242    | 0,020   | 362     |
| 7     | 13,863    | 1626    | 0,027   | 454     |
| 8     | 14,013    | 1834    | 0,030   | 346     |
| 9     | 14,446    | 9295    | 0,152   | 1420    |
| 10    | 14,881    | 1171    | 0,019   | 201     |
| 11    | 15,075    | 49286   | 0,804   | 7422    |
| 12    | 15,424    | 2035    | 0,033   | 225     |
| 13    | 16,214    | 1765    | 0,029   | 278     |
| 14    | 18,803    | 1463    | 0,024   | 141     |
| Total |           | 6128236 | 100,000 | 1488754 |

Figure S10. HPLC chromatogram of compound 15.



# ==== Shimadzu LabSolutions Analysis Report =====

Sample Name : MAGL18\_125uM  
 Sample ID : MAGL18\_125uM  
 Data Filename : MAGL18\_125uM\_p.lcd  
 Method Filename : MAGL254.lcm

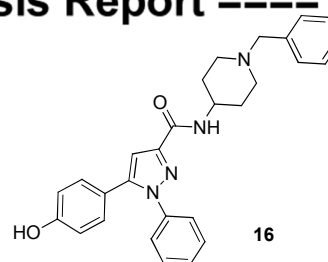

mAU

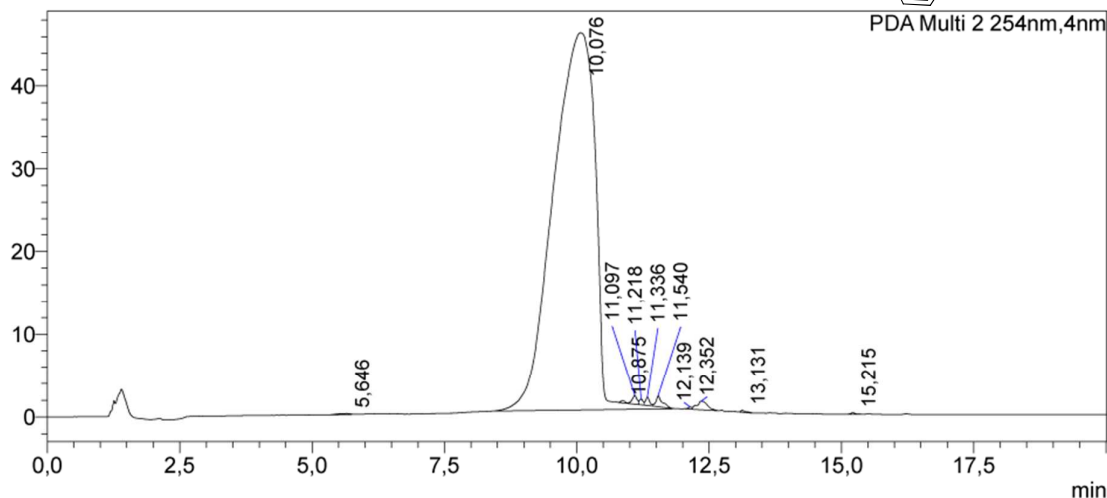

PDA Ch2 254nm

| Peak# | Ret. Time | Area    | Area%   | Height |
|-------|-----------|---------|---------|--------|
| 1     | 5,646     | 2096    | 0,082   | 119    |
| 2     | 10,076    | 2503836 | 98,129  | 45633  |
| 3     | 10,875    | 1463    | 0,057   | 249    |
| 4     | 11,097    | 6847    | 0,268   | 1074   |
| 5     | 11,218    | 3462    | 0,136   | 687    |
| 6     | 11,336    | 5236    | 0,205   | 1022   |
| 7     | 11,540    | 10814   | 0,424   | 1310   |
| 8     | 12,139    | 1180    | 0,046   | 248    |
| 9     | 12,352    | 14083   | 0,552   | 1004   |
| 10    | 13,131    | 1387    | 0,054   | 251    |
| 11    | 15,215    | 1164    | 0,046   | 169    |
| Total |           | 2551569 | 100,000 | 51765  |

Figure S11. HPLC chromatogram of compound 16.

# ==== Shimadzu LabSolutions Analysis Report ====

Sample Name : MAGL14\_125uM  
 Sample ID : MAGL14\_125uM  
 Data Filename : MAGL14\_125uM\_p.lcd  
 Method Filename : MAGL254.lcm

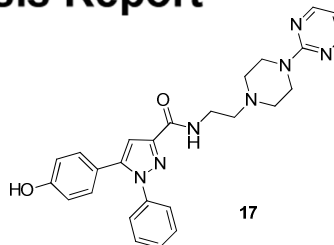

mAU

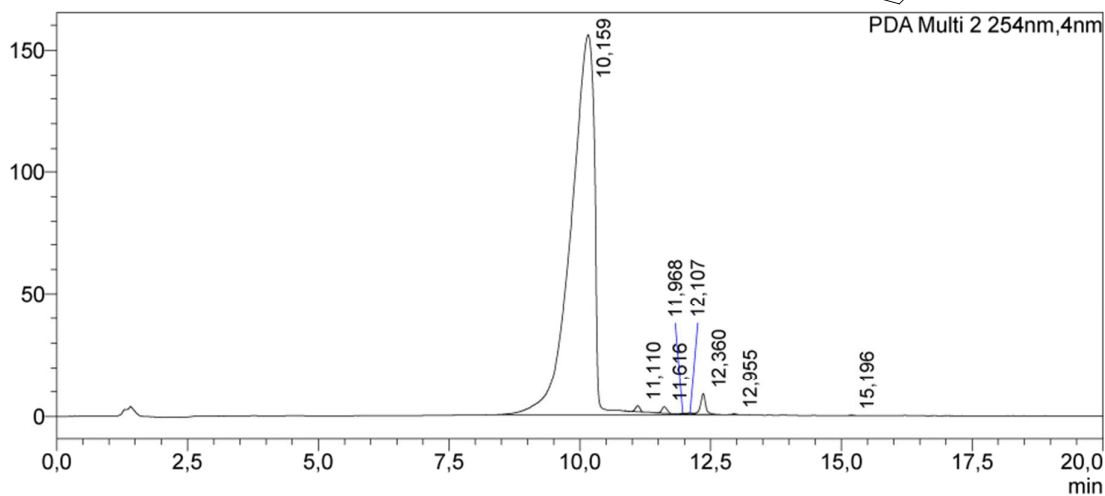

PDA Ch2 254nm

| Peak# | Ret. Time | Area    | Area%   | Height |
|-------|-----------|---------|---------|--------|
| 1     | 10,159    | 4873770 | 97,980  | 155693 |
| 2     | 11,110    | 15025   | 0,302   | 2444   |
| 3     | 11,616    | 18337   | 0,369   | 2615   |
| 4     | 11,968    | 1714    | 0,034   | 258    |
| 5     | 12,107    | 3206    | 0,064   | 473    |
| 6     | 12,360    | 57929   | 1,165   | 8415   |
| 7     | 12,955    | 2852    | 0,057   | 444    |
| 8     | 15,196    | 1403    | 0,028   | 201    |
| Total |           | 4974235 | 100,000 | 170545 |

Figure S12. HPLC chromatogram of compound 17.

## ==== Shimadzu LabSolutions Analysis Report =====

Sample Name : MAGL24\_250uM  
 Sample ID : MAGL24\_250uM  
 Data Filename : MAGL24\_250uM\_p.lcd  
 Method Filename : MAGL254.lcm

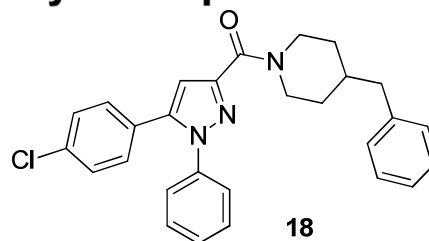

mAU

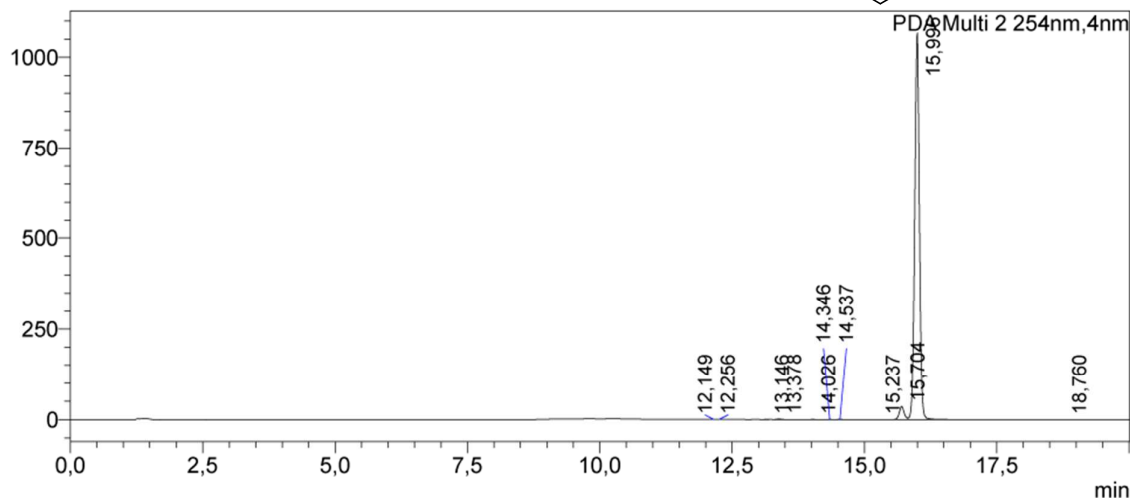

PDA Ch2 254nm

| Peak# | Ret. Time | Area    | Area%   | Height  |
|-------|-----------|---------|---------|---------|
| 1     | 12,149    | 1749    | 0,025   | 332     |
| 2     | 12,256    | 3292    | 0,048   | 527     |
| 3     | 13,146    | 1121    | 0,016   | 284     |
| 4     | 13,378    | 8769    | 0,127   | 1654    |
| 5     | 14,026    | 1760    | 0,025   | 314     |
| 6     | 14,346    | 1438    | 0,021   | 319     |
| 7     | 14,537    | 3372    | 0,049   | 710     |
| 8     | 15,237    | 1497    | 0,022   | 208     |
| 9     | 15,704    | 234038  | 3,380   | 36140   |
| 10    | 15,996    | 6666766 | 96,270  | 1067347 |
| 11    | 18,760    | 1298    | 0,019   | 140     |
| Total |           | 6925098 | 100,000 | 1107974 |

**Figure S13. HPLC chromatogram of compound 18.**

# ==== Shimadzu LabSolutions Analysis Report =====

Sample Name : MAGL25\_250uM  
 Sample ID : MAGL25\_250uM  
 Data Filename : MAGL25\_250uM\_p.lcd  
 Method Filename : MAGL254.lcm

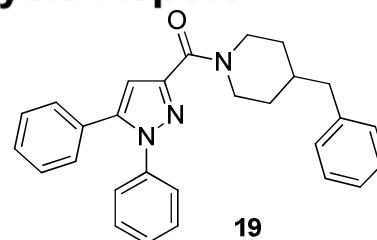

mAU

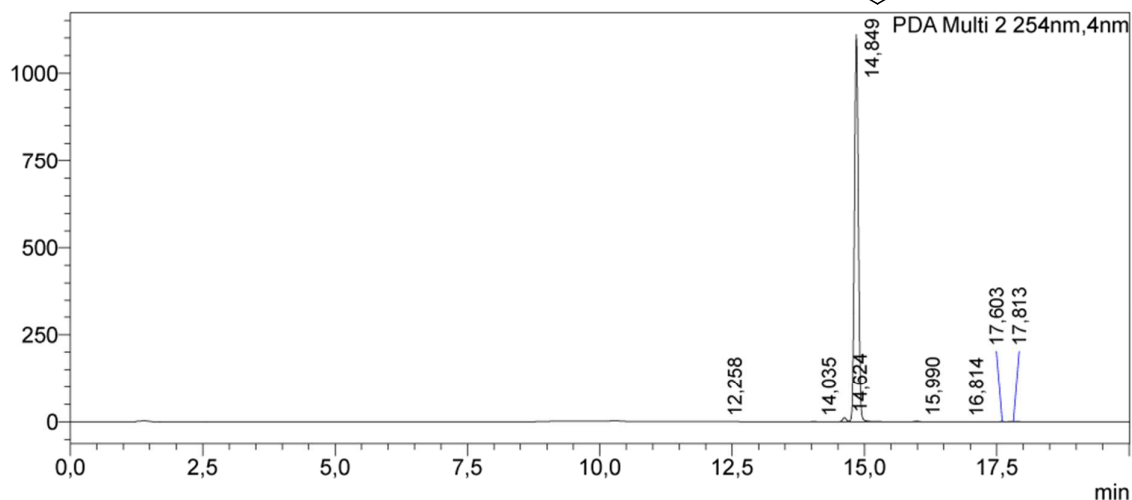

PDA Ch2 254nm

| Peak# | Ret. Time | Area    | Area%   | Height  |
|-------|-----------|---------|---------|---------|
| 1     | 12,258    | 4170    | 0,073   | 503     |
| 2     | 14,035    | 4532    | 0,080   | 731     |
| 3     | 14,624    | 60659   | 1,067   | 11823   |
| 4     | 14,849    | 5588320 | 98,305  | 1109593 |
| 5     | 15,990    | 10003   | 0,176   | 1651    |
| 6     | 16,814    | 1337    | 0,024   | 186     |
| 7     | 17,603    | 3764    | 0,066   | 482     |
| 8     | 17,813    | 11863   | 0,209   | 1109    |
| Total |           | 5684648 | 100,000 | 1126079 |

Figure S14. HPLC chromatogram of compound 19.

## ==== Shimadzu LabSolutions Analysis Report =====

Sample Name : MAGL21\_250uM  
 Sample ID : MAGL21\_250uM  
 Data Filename : MAGL21\_250uM\_p.lcd  
 Method Filename : MAGL254.lcm

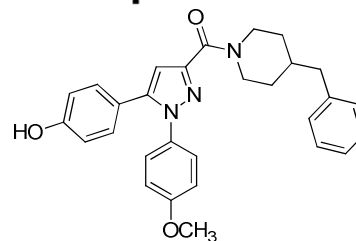

mAU

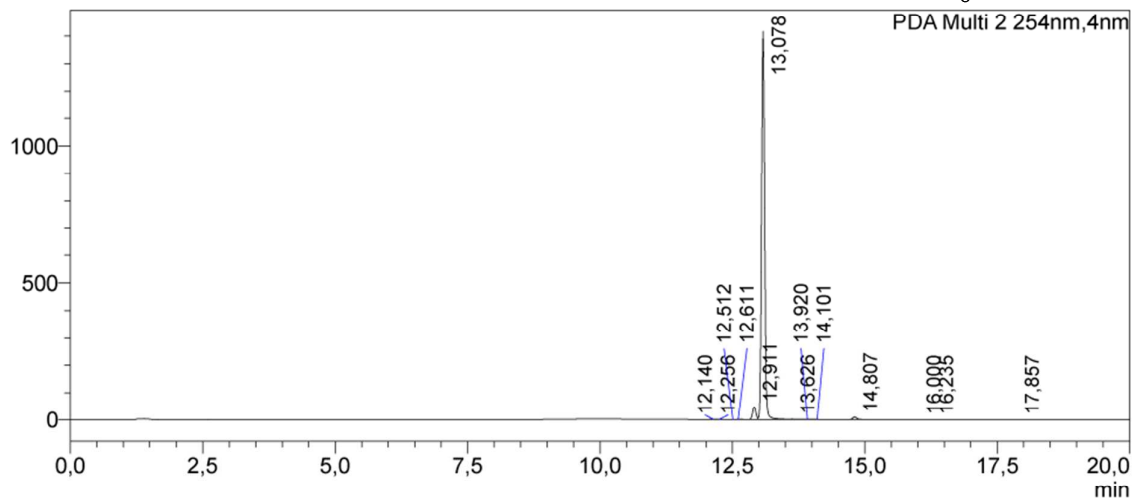

PDA Ch2 254nm

| Peak# | Ret. Time | Area    | Area%   | Height  |
|-------|-----------|---------|---------|---------|
| 1     | 12,140    | 3193    | 0,053   | 427     |
| 2     | 12,256    | 3272    | 0,055   | 563     |
| 3     | 12,512    | 1594    | 0,027   | 206     |
| 4     | 12,611    | 3296    | 0,055   | 393     |
| 5     | 12,911    | 201825  | 3,376   | 47083   |
| 6     | 13,078    | 5692771 | 95,222  | 1416689 |
| 7     | 13,626    | 2399    | 0,040   | 619     |
| 8     | 13,920    | 4202    | 0,070   | 646     |
| 9     | 14,101    | 1149    | 0,019   | 272     |
| 10    | 14,807    | 55064   | 0,921   | 9268    |
| 11    | 16,000    | 4911    | 0,082   | 543     |
| 12    | 16,235    | 2547    | 0,043   | 233     |
| 13    | 17,857    | 2185    | 0,037   | 223     |
| Total |           | 5978407 | 100,000 | 1477163 |

Figure S15. HPLC chromatogram of compound 20.

# ==== Shimadzu LabSolutions Analysis Report =====

Sample Name : MAGL23\_250uM  
 Sample ID : MAGL23\_250uM  
 Data Filename : MAGL23\_250uM\_p.lcd  
 Method Filename : MAGL254.lcm

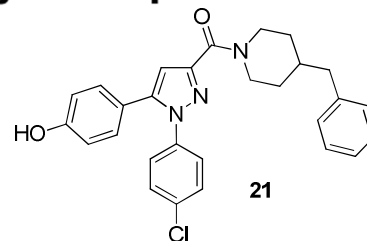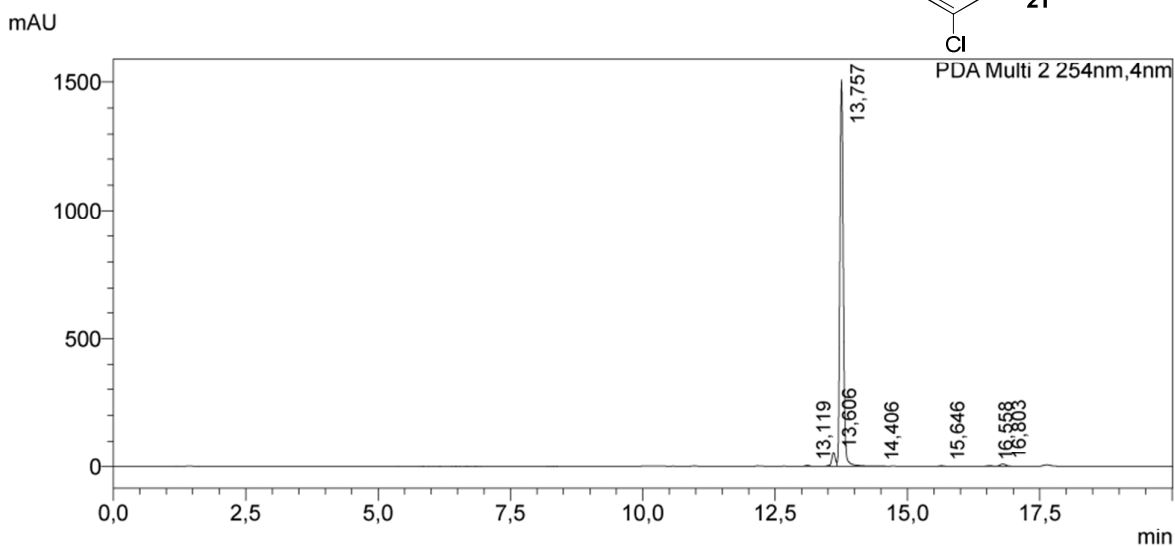

PDA Ch2 254nm

| Peak# | Ret. Time | Area    | Area%   | Height  |
|-------|-----------|---------|---------|---------|
| 1     | 13,119    | 20181   | 0,289   | 3519    |
| 2     | 13,606    | 245858  | 3,517   | 52383   |
| 3     | 13,757    | 6611152 | 94,577  | 1507811 |
| 4     | 14,406    | 8417    | 0,120   | 1105    |
| 5     | 15,646    | 13378   | 0,191   | 1968    |
| 6     | 16,558    | 20858   | 0,298   | 2477    |
| 7     | 16,803    | 70364   | 1,007   | 8513    |
| Total |           | 6990209 | 100,000 | 1577776 |

Figure S16. HPLC chromatogram of compound 21.

## ==== Shimadzu LabSolutions Analysis Report =====

Sample Name : MAGL42\_250uM  
 Sample ID : MAGL42\_250uM  
 Data Filename : MAGL42\_250uM\_p.lcd  
 Method Filename : MAGL254.lcm

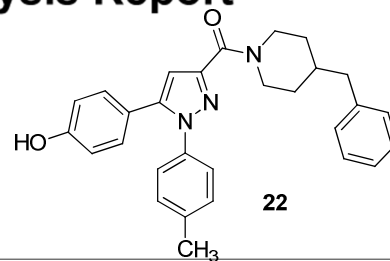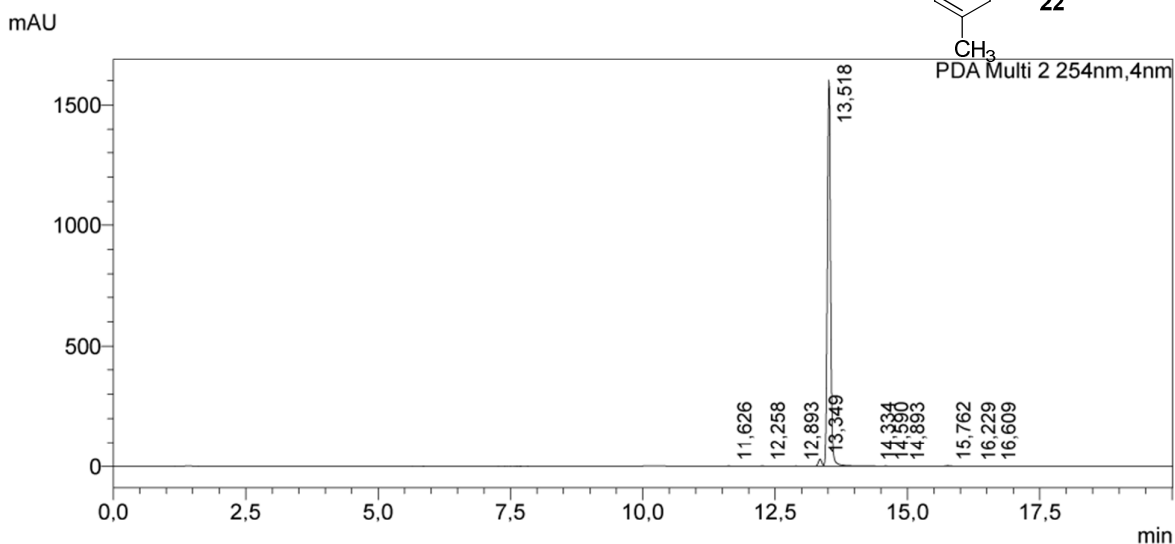

PDA Ch2 254nm

| Peak# | Ret. Time | Area    | Area%   | Height  |
|-------|-----------|---------|---------|---------|
| 1     | 11,626    | 2991    | 0,042   | 821     |
| 2     | 12,258    | 5746    | 0,080   | 823     |
| 3     | 12,893    | 3539    | 0,049   | 728     |
| 4     | 13,349    | 132787  | 1,848   | 29617   |
| 5     | 13,518    | 7012920 | 97,588  | 1603229 |
| 6     | 14,334    | 1093    | 0,015   | 261     |
| 7     | 14,590    | 2271    | 0,032   | 341     |
| 8     | 14,893    | 2381    | 0,033   | 420     |
| 9     | 15,762    | 16363   | 0,228   | 2029    |
| 10    | 16,229    | 1754    | 0,024   | 290     |
| 11    | 16,609    | 4441    | 0,062   | 518     |
| Total |           | 7186285 | 100,000 | 1639077 |

**Figure S17. HPLC chromatogram of compound 22.**

# ==== Shimadzu LabSolutions Analysis Report =====

Sample Name : MAGL27\_250uM  
 Sample ID : MAGL27\_250uM  
 Data Filename : MAGL27\_250uM\_p.lcd  
 Method Filename : MAGL254.lcm

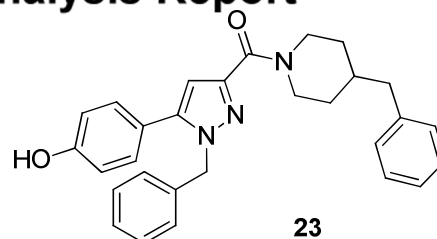

mAU

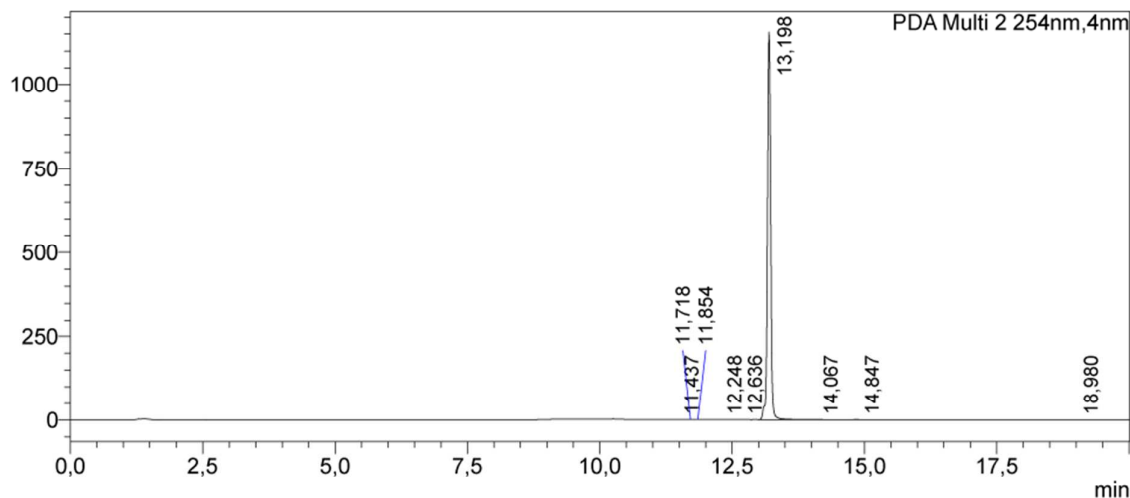

PDA Ch2 254nm

| Peak# | Ret. Time | Area    | Area%   | Height  |
|-------|-----------|---------|---------|---------|
| 1     | 11,437    | 1501    | 0,031   | 215     |
| 2     | 11,718    | 1321    | 0,027   | 338     |
| 3     | 11,854    | 1248    | 0,025   | 283     |
| 4     | 12,248    | 5922    | 0,121   | 549     |
| 5     | 12,636    | 3920    | 0,080   | 780     |
| 6     | 13,198    | 4875978 | 99,546  | 1155395 |
| 7     | 14,067    | 2598    | 0,053   | 416     |
| 8     | 14,847    | 3114    | 0,064   | 601     |
| 9     | 18,980    | 2591    | 0,053   | 230     |
| Total |           | 4898193 | 100,000 | 1158808 |

Figure S18. HPLC chromatogram of compound 23.



## ==== Shimadzu LabSolutions Analysis Report =====

Sample Name : MAGL29\_250uM  
 Sample ID : MAGL29\_250uM  
 Data Filename : MAGL29\_250uM\_p.lcd  
 Method Filename : MAGL254.lcm

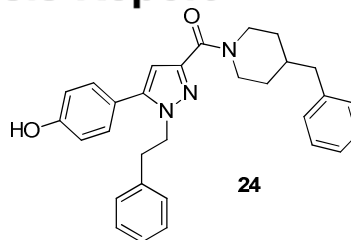

mAU

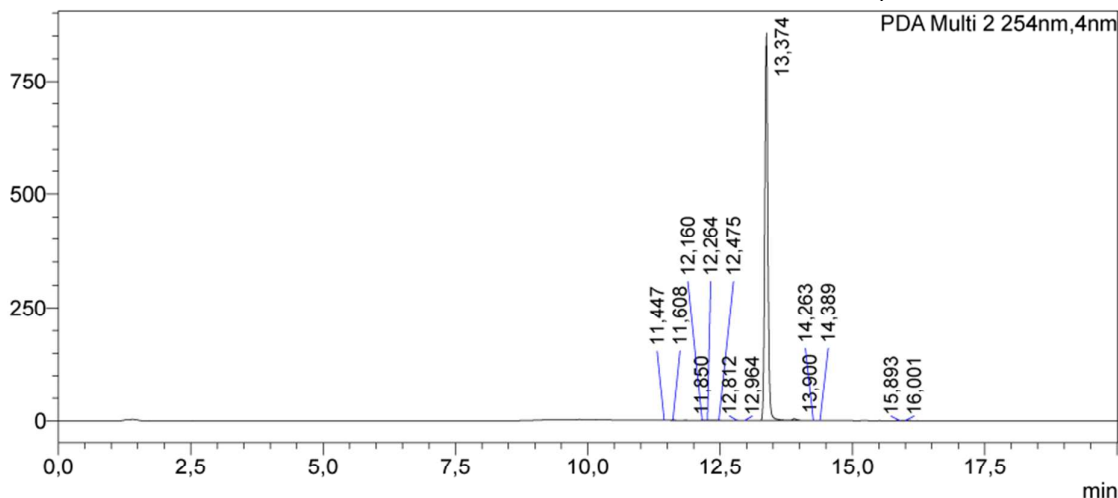

PDA Ch2 254nm

| Peak# | Ret. Time | Area    | Area%   | Height |
|-------|-----------|---------|---------|--------|
| 1     | 11,447    | 1621    | 0,045   | 260    |
| 2     | 11,608    | 3690    | 0,102   | 800    |
| 3     | 11,850    | 1680    | 0,046   | 433    |
| 4     | 12,160    | 1192    | 0,033   | 239    |
| 5     | 12,264    | 4158    | 0,115   | 449    |
| 6     | 12,475    | 2651    | 0,073   | 582    |
| 7     | 12,812    | 2825    | 0,078   | 736    |
| 8     | 12,964    | 1736    | 0,048   | 214    |
| 9     | 13,374    | 3571897 | 98,720  | 855681 |
| 10    | 13,900    | 17795   | 0,492   | 3326   |
| 11    | 14,263    | 1540    | 0,043   | 280    |
| 12    | 14,389    | 1375    | 0,038   | 227    |
| 13    | 15,893    | 2187    | 0,060   | 367    |
| 14    | 16,001    | 3847    | 0,106   | 546    |
| Total |           | 3618195 | 100,000 | 864142 |

Figure S19. HPLC chromatogram of compound 24.

# ==== Shimadzu LabSolutions Analysis Report =====

Sample Name : MAGL30\_250uM  
 Sample ID : MAGL30\_250uM  
 Data Filename : MAGL30\_250uM\_p.lcd  
 Method Filename : MAGL254.lcm

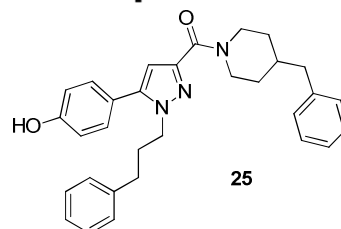

mAU

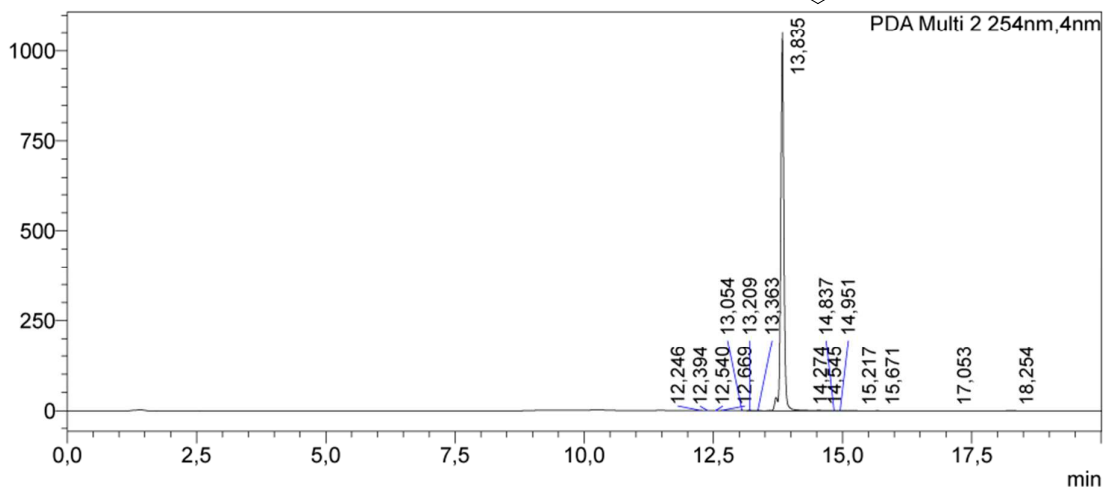

PDA Ch2 254nm

| Peak# | Ret. Time | Area    | Area%   | Height  |
|-------|-----------|---------|---------|---------|
| 1     | 12,246    | 9080    | 0,193   | 1138    |
| 2     | 12,394    | 1838    | 0,039   | 318     |
| 3     | 12,540    | 1774    | 0,038   | 342     |
| 4     | 12,669    | 5576    | 0,118   | 1003    |
| 5     | 13,054    | 5237    | 0,111   | 1122    |
| 6     | 13,209    | 8257    | 0,175   | 1539    |
| 7     | 13,363    | 4717    | 0,100   | 930     |
| 8     | 13,835    | 4653273 | 98,732  | 1050100 |
| 9     | 14,274    | 1197    | 0,025   | 375     |
| 10    | 14,545    | 3759    | 0,080   | 809     |
| 11    | 14,837    | 1131    | 0,024   | 192     |
| 12    | 14,951    | 2325    | 0,049   | 293     |
| 13    | 15,217    | 1190    | 0,025   | 174     |
| 14    | 15,671    | 1540    | 0,033   | 202     |
| 15    | 17,053    | 2597    | 0,055   | 317     |
| 16    | 18,254    | 9545    | 0,203   | 888     |
| Total |           | 4713035 | 100,000 | 1059742 |

Figure S20. HPLC chromatogram of compound 25.

# ==== Shimadzu LabSolutions Analysis Report =====

Sample Name : MF32\_250uM  
 Sample ID : MF32\_250uM  
 Data Filename : MAGL32\_250uM\_p.lcd  
 Method Filename : MAGL254.lcm

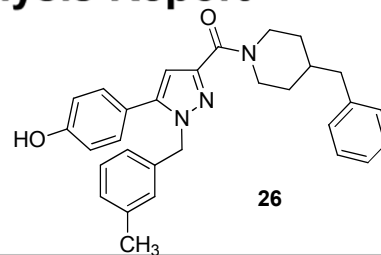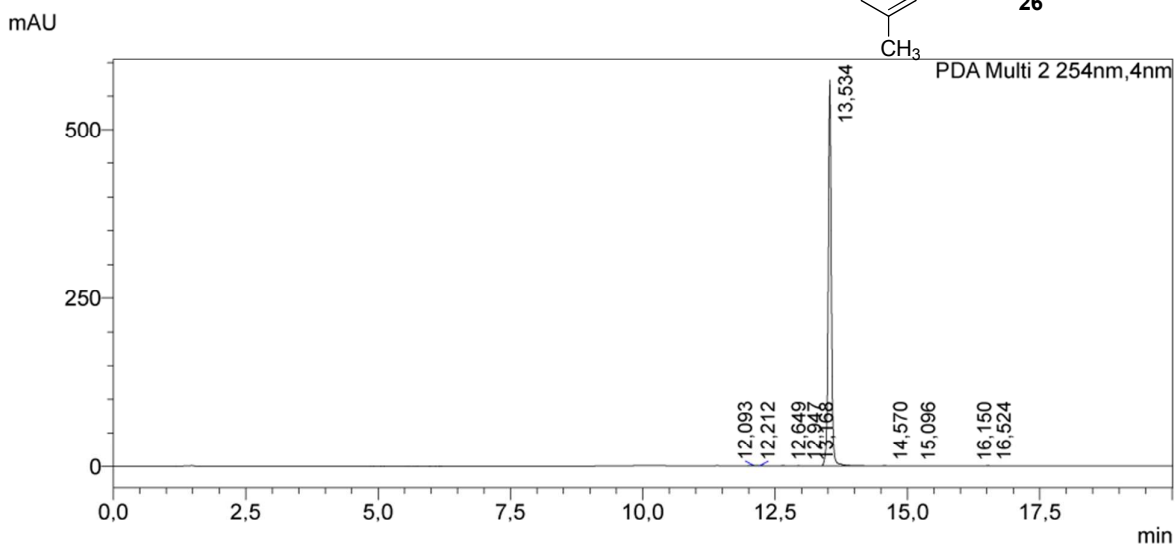

PDA Ch2 254nm

| Peak# | Ret. Time | Area    | Area%   | Height |
|-------|-----------|---------|---------|--------|
| 1     | 12,093    | 4508    | 0,186   | 710    |
| 2     | 12,212    | 2425    | 0,100   | 302    |
| 3     | 12,649    | 1698    | 0,070   | 405    |
| 4     | 12,947    | 1445    | 0,060   | 264    |
| 5     | 13,168    | 1180    | 0,049   | 242    |
| 6     | 13,534    | 2406979 | 99,223  | 573470 |
| 7     | 14,570    | 1905    | 0,079   | 302    |
| 8     | 15,096    | 1092    | 0,045   | 160    |
| 9     | 16,150    | 1735    | 0,072   | 229    |
| 10    | 16,524    | 2856    | 0,118   | 373    |
| Total |           | 2425822 | 100,000 | 576457 |

Figure S21. HPLC chromatogram of compound 26.

# ==== Shimadzu LabSolutions Analysis Report =====

Sample Name : MAGL33\_250uM  
 Sample ID : MAGL33\_250uM  
 Data Filename : MAGL33\_250uM\_p.lcd  
 Method Filename : MAGL254.lcm

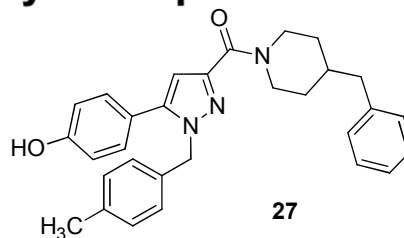

mAU

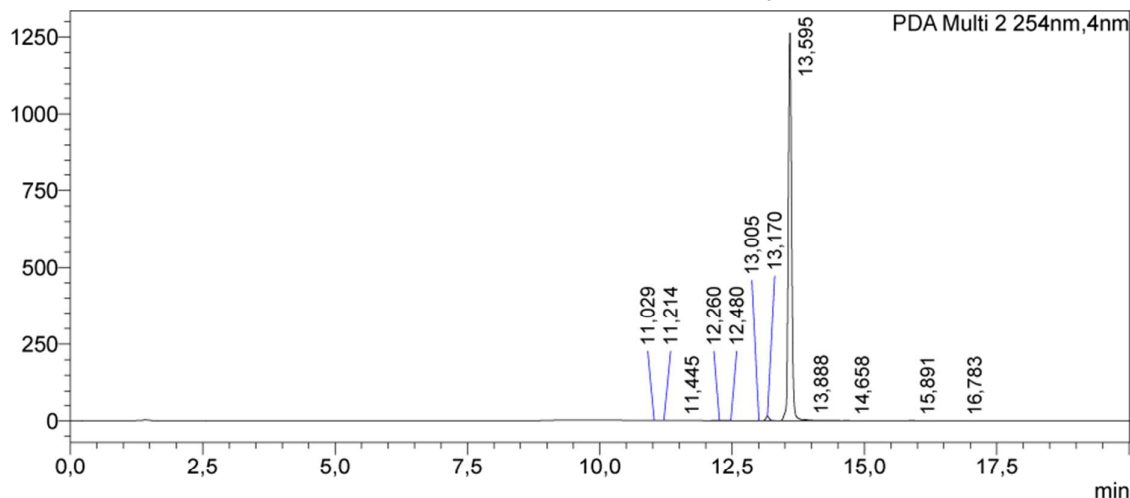

PDA Ch2 254nm

| Peak# | Ret. Time | Area    | Area%   | Height  |
|-------|-----------|---------|---------|---------|
| 1     | 11,029    | 2706    | 0,048   | 231     |
| 2     | 11,214    | 3623    | 0,065   | 361     |
| 3     | 11,445    | 4207    | 0,075   | 313     |
| 4     | 12,260    | 4505    | 0,080   | 520     |
| 5     | 12,480    | 1374    | 0,025   | 160     |
| 6     | 13,005    | 1585    | 0,028   | 230     |
| 7     | 13,170    | 62143   | 1,110   | 14840   |
| 8     | 13,595    | 5503863 | 98,337  | 1262608 |
| 9     | 13,888    | 2171    | 0,039   | 773     |
| 10    | 14,658    | 1240    | 0,022   | 211     |
| 11    | 15,891    | 7333    | 0,131   | 1131    |
| 12    | 16,783    | 2197    | 0,039   | 282     |
| Total |           | 5596946 | 100,000 | 1281660 |

Figure S22. HPLC chromatogram of compound 27.

## ==== Shimadzu LabSolutions Analysis Report =====

Sample Name : MAGL34\_250uM  
 Sample ID : MAGL34\_250uM  
 Data Filename : MAGL34\_250uM\_p.lcd  
 Method Filename : MAGL254.lcm

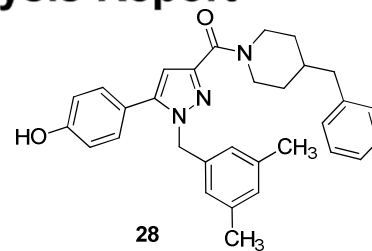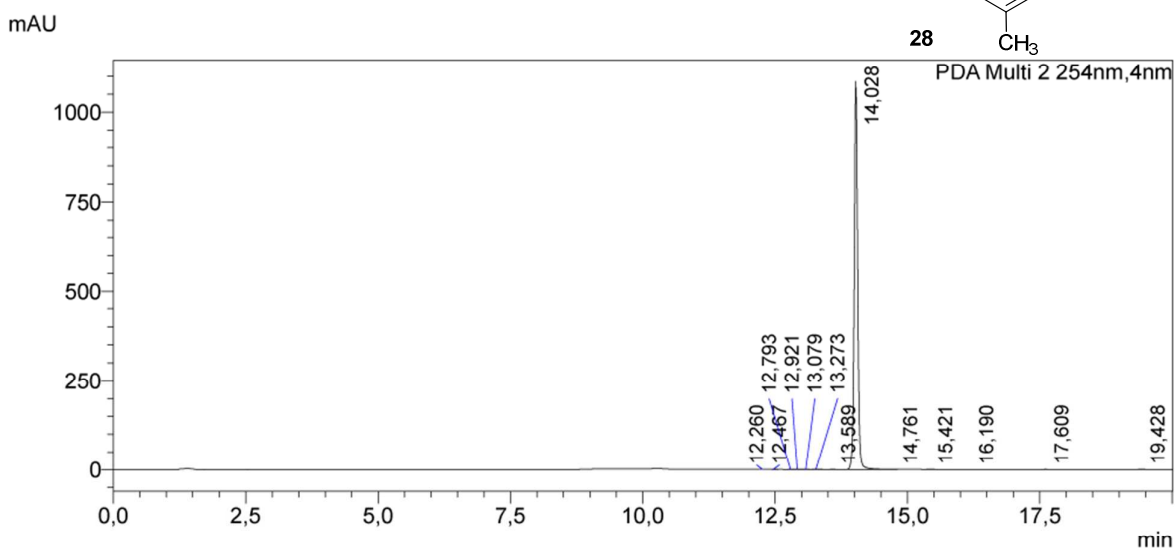

PDA Ch2 254nm

| Peak# | Ret. Time | Area    | Area%   | Height  |
|-------|-----------|---------|---------|---------|
| 1     | 12,260    | 6149    | 0,122   | 585     |
| 2     | 12,467    | 1499    | 0,030   | 260     |
| 3     | 12,793    | 1215    | 0,024   | 313     |
| 4     | 12,921    | 1370    | 0,027   | 306     |
| 5     | 13,079    | 4279    | 0,085   | 604     |
| 6     | 13,273    | 6154    | 0,122   | 971     |
| 7     | 13,589    | 2379    | 0,047   | 553     |
| 8     | 14,028    | 5005452 | 99,252  | 1085573 |
| 9     | 14,761    | 2315    | 0,046   | 473     |
| 10    | 15,421    | 2144    | 0,043   | 236     |
| 11    | 16,190    | 1157    | 0,023   | 137     |
| 12    | 17,609    | 2932    | 0,058   | 339     |
| 13    | 19,428    | 6128    | 0,122   | 481     |
| Total |           | 5043173 | 100,000 | 1090830 |

**Figure S23. HPLC chromatogram of compound 28.**

## ==== Shimadzu LabSolutions Analysis Report =====

Sample Name : MAGL35\_250uM  
 Sample ID : MAGL35\_250uM  
 Data Filename : MAGL35\_250uM\_p.lcd  
 Method Filename : MAGL254.lcm

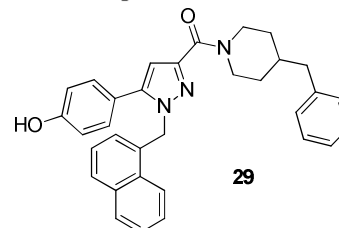

mAU

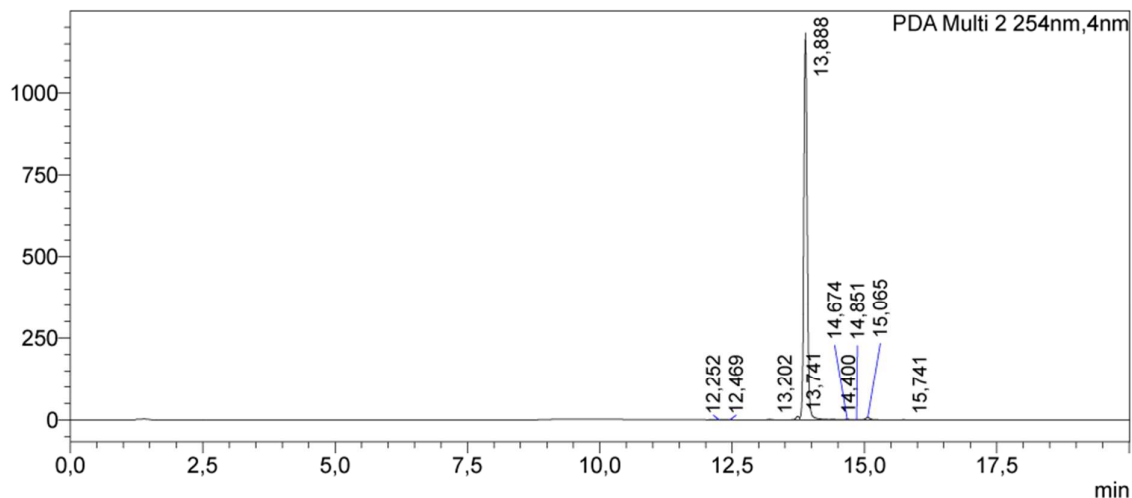

PDA Ch2 254nm

| Peak# | Ret. Time | Area    | Area%   | Height  |
|-------|-----------|---------|---------|---------|
| 1     | 12,252    | 5141    | 0,096   | 555     |
| 2     | 12,469    | 1501    | 0,028   | 188     |
| 3     | 13,202    | 6705    | 0,125   | 1282    |
| 4     | 13,741    | 47365   | 0,885   | 10163   |
| 5     | 13,888    | 5237741 | 97,838  | 1182530 |
| 6     | 14,400    | 3128    | 0,058   | 733     |
| 7     | 14,674    | 6084    | 0,114   | 1125    |
| 8     | 14,851    | 1703    | 0,032   | 350     |
| 9     | 15,065    | 42150   | 0,787   | 6999    |
| 10    | 15,741    | 1951    | 0,036   | 286     |
| Total |           | 5353470 | 100,000 | 1204212 |

**Figure S24. HPLC chromatogram of compound 29.**
